# Supplementary material for: Ultra-thick electrodes based on activated wood-carbon towards high-performance quasi-solid-state supercapacitors
Source: Royal Society of Chemistry journal article supplement (doi:10.1039/c9cp06181a), 2019-12-16
Supplement: c9cp06181a1.pdf [file c9cp06181a1.pdf]

## Supporting Information

### **Ultra-thick electrodes based on activated wood-carbon toward high-performance quasi-solid-state supercapacitors**

Wenjia Zhang,<sup>a</sup> Ting Liu,<sup>a</sup> Jirong Mou,<sup>a</sup> Jianlin Huang,<sup>\*a</sup> and Meilin Liu<sup>b</sup>

<sup>a</sup>Guangzhou Key Laboratory for Surface Chemistry of Energy Materials, New Energy Institute, School of Environment and Energy, South China University of Technology, Guangzhou 510006, China.

<sup>b</sup>A Materials Science and Engineering, Georgia Institute of Technology, Address, Atlanta, GA 30332-0245, USA.

### **Additional images**

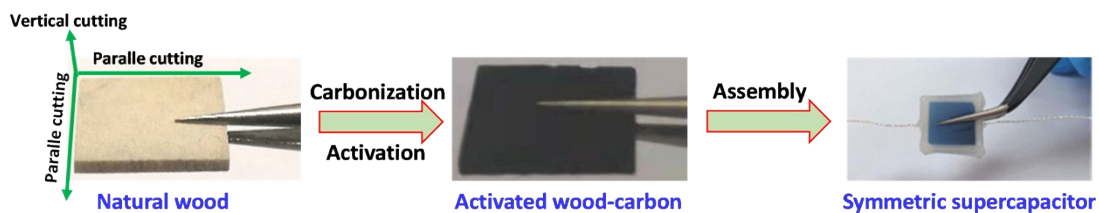

**Figure S1.** Construction of a quasi-solid-state symmetric supercapacitor (SSC) based on activated wood carbon (AWC) monoliths as freestanding thick electrodes.

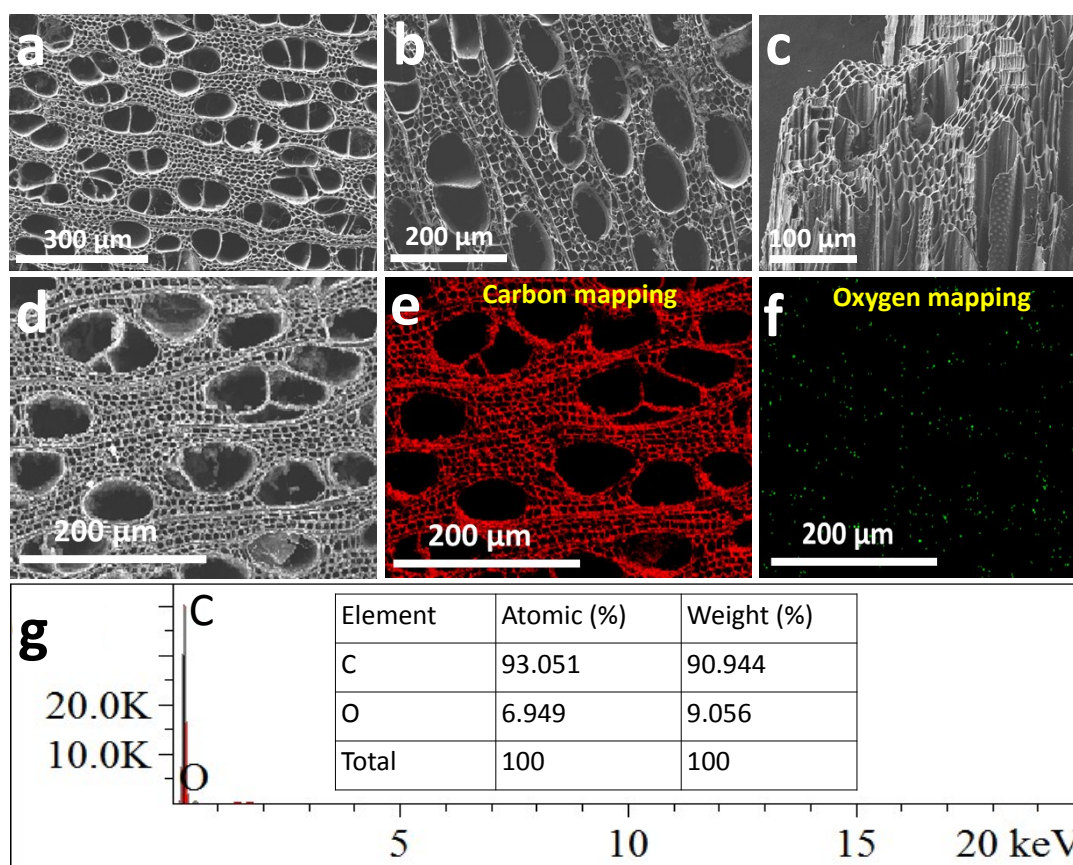

**Figure S2.** (a-d) SEM images for the carbonized wood (CW), and e, f) Elemental mapping images of e) C and f) O, respectively in (d). (g) the atomic ratio of C and O in the CW.

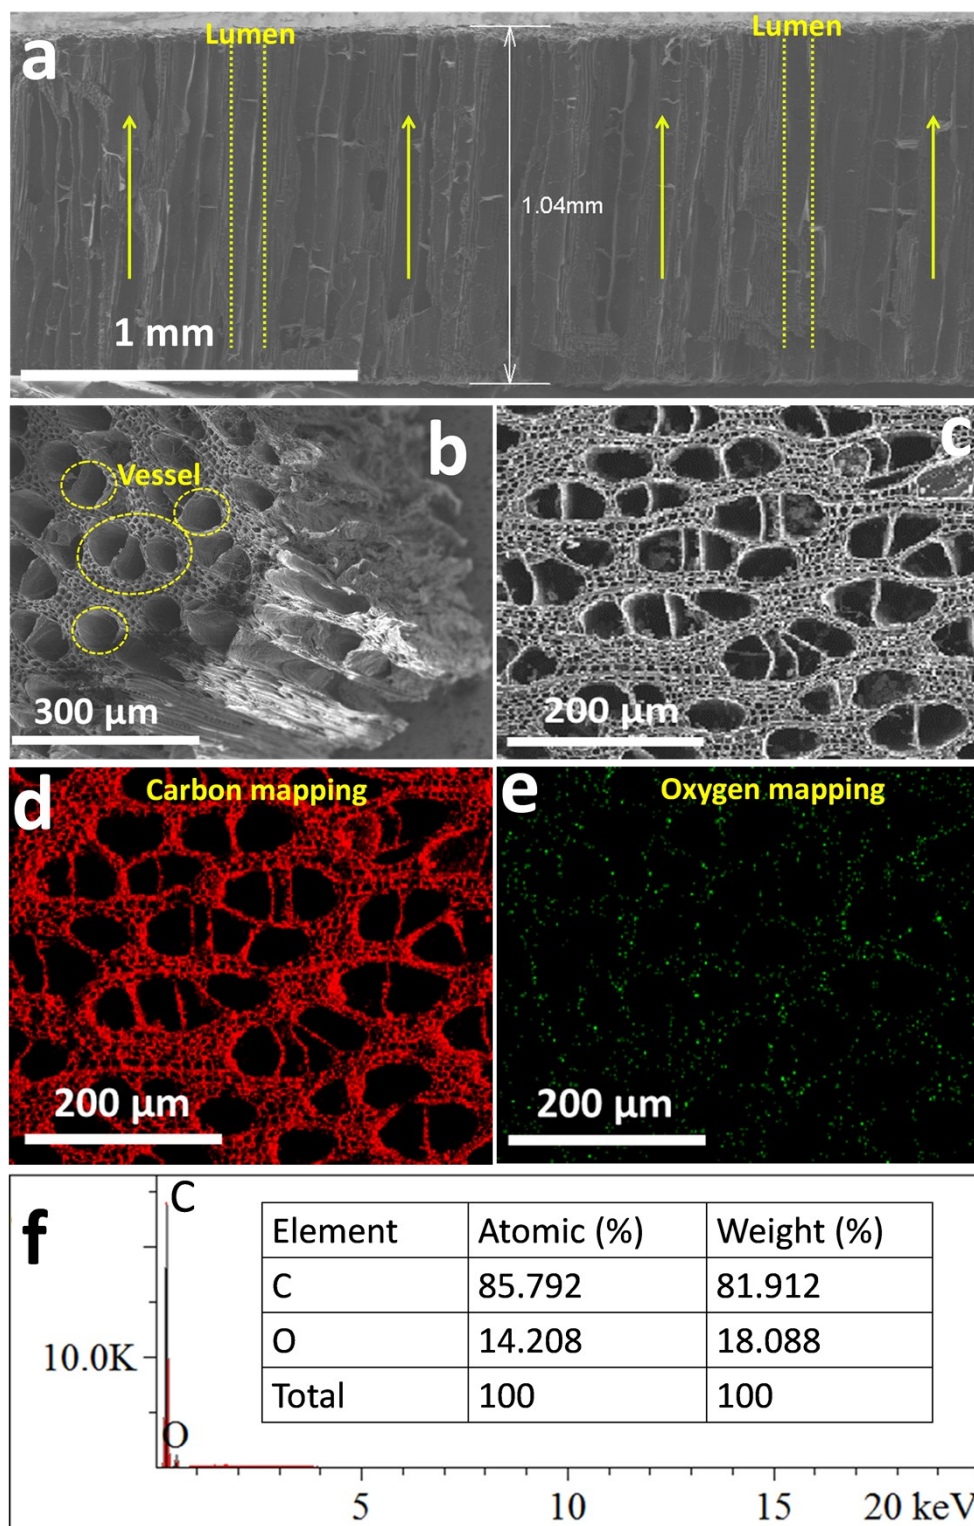

**Figure S3.** (a-c) SEM images for the activated wood carbon (AWC): a) cross-sectional view, showing the thickness of 1.04 mm for the AWC; b, c) top view; (d, e) Elemental mapping images of i) C and j) O, respectively in (c). (f) the atomic ratio of C and O in the AWC.

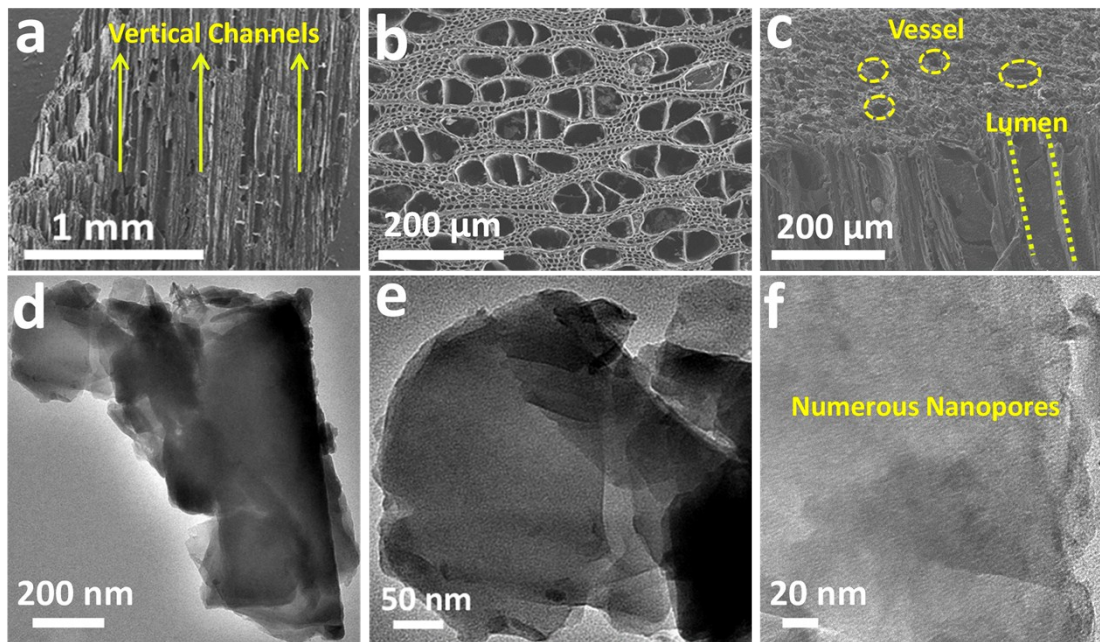

**Figure S4.** (a-c) SEM images for the activated wood carbon (AWC), showing numerous vertical channels in the AWC; d-f) different magnification TEM images of the AWC, demonstrating highly nanoporous structure.

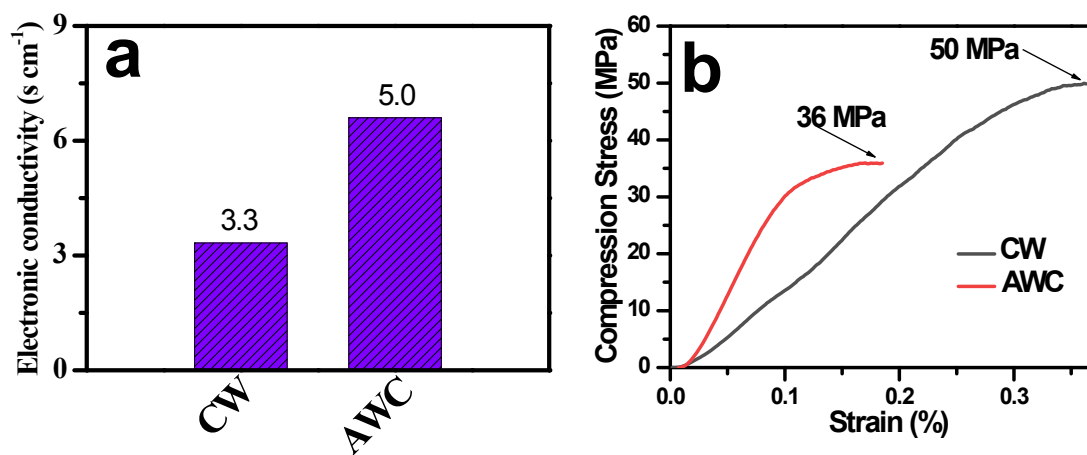

**Figure S5.** Electrical and mechanical properties of the CW and AWC electrodes: (a) electronic conductivity, (b) compressive stress-strain curves.



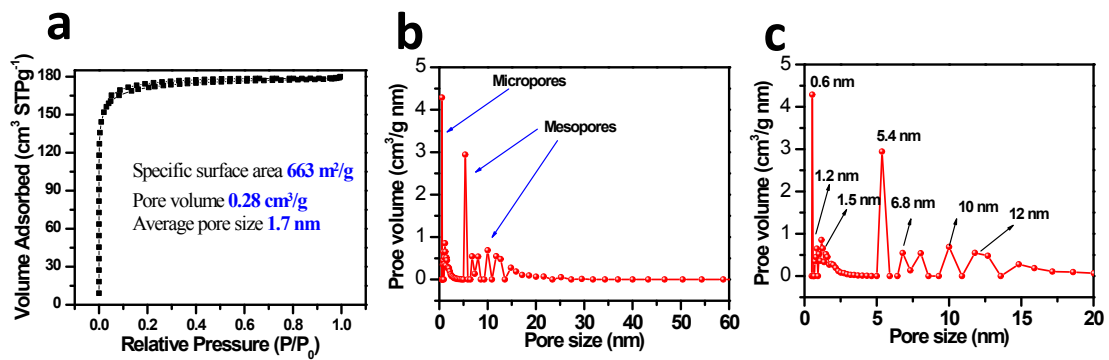

**Figure S6.** The analysis on hierarchical porous structure in the activated wood carbon (AWC), (a)  $\text{N}_2$  adsorption and desorption isotherm; and (b) pore size distribution; (c) a part of 0-20 nm pore size magnified in (h).

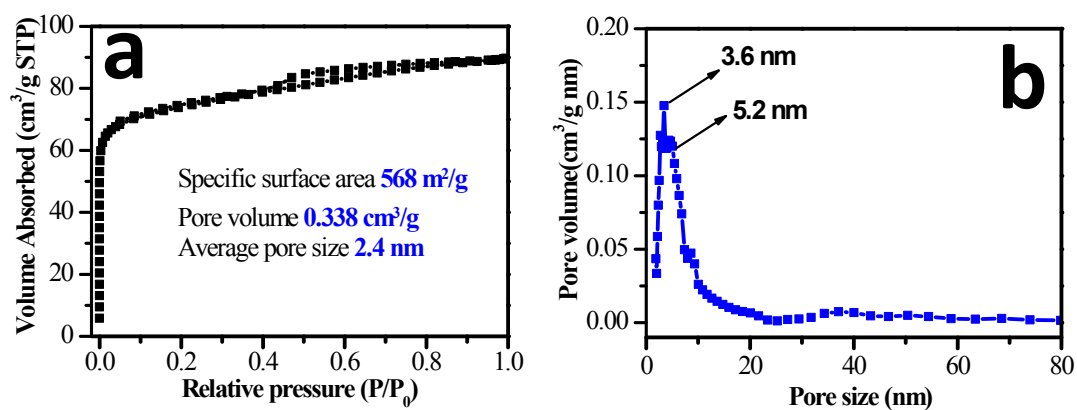

**Figure S7.** The analysis on porous structure in the carbonized wood (CW), (a)  $N_2$  adsorption and desorption isotherm; and (b) pore size distribution.

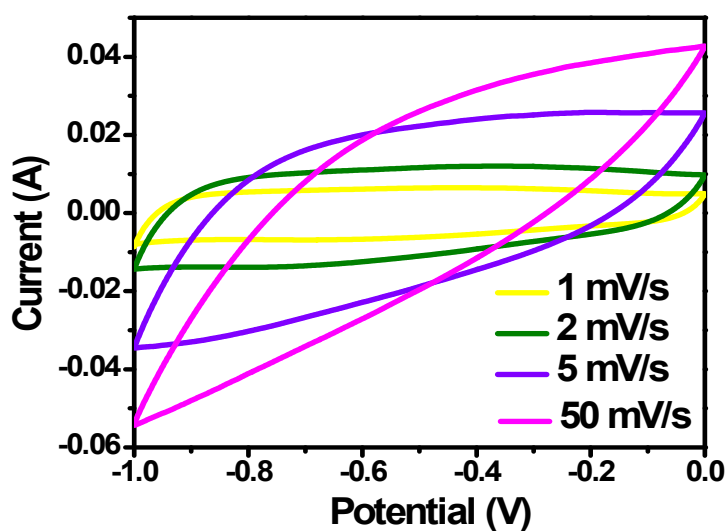

**Figure S8.** CV curves of the AWC electrode at the scan rate from 1.0 to 50 mV/s.

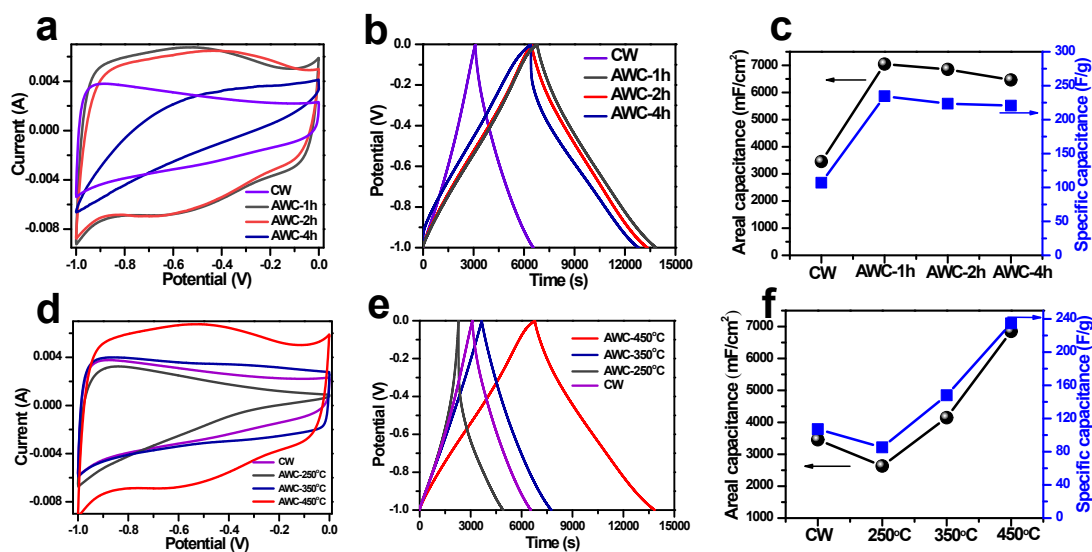

**Figure S9.** The electrochemical performance of the AWC samples with different activation time (a-c) and temperature (d-f) in air atmosphere; (a, d) CV curves at the scan rate of 1.0 mV/s, (b, e) galvanostatic charge-discharge curves at a current densities of 1.0 mA/cm<sup>2</sup>; and (c, f) specific capacitance. When the activation time was increased from 1 to 4 hours, the capacitance value exhibits a slight decrease. However, the activation temperature was increased from 250 to 450°C, the capacitance value exhibits an obvious increase, further increasing the activation temperature (above 450°C), the AWC sample will be gone by burning. Hence, the activation time and temperature of 1h and 450°C respectively are the best condition.



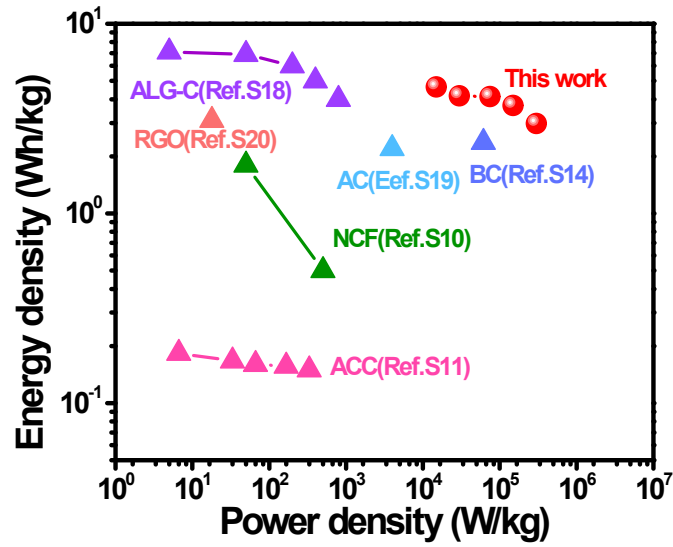

**Figure S10.** Comparison of the energy and power densities based mass of the two electrodes with the previously reported electrode materials.

In addition, the quasi-solid-state SSC also demonstrated an increased energy density of 4.64 Wh/kg at a power density of 14.95 kW/kg, showing better performance than some carbon-based supercapacitors reported recently.

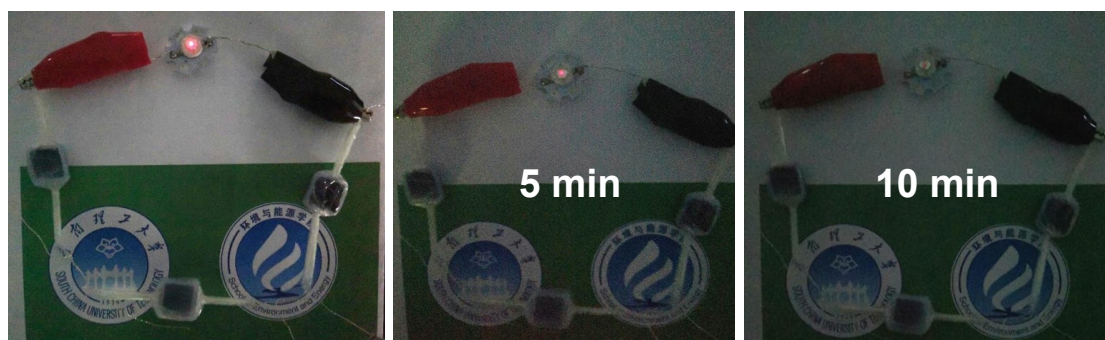

**Figure S11.** The quasi-solid-state SSC assembled by the two identical AWC powered an LED (1 W) for 10 mins by three in series.

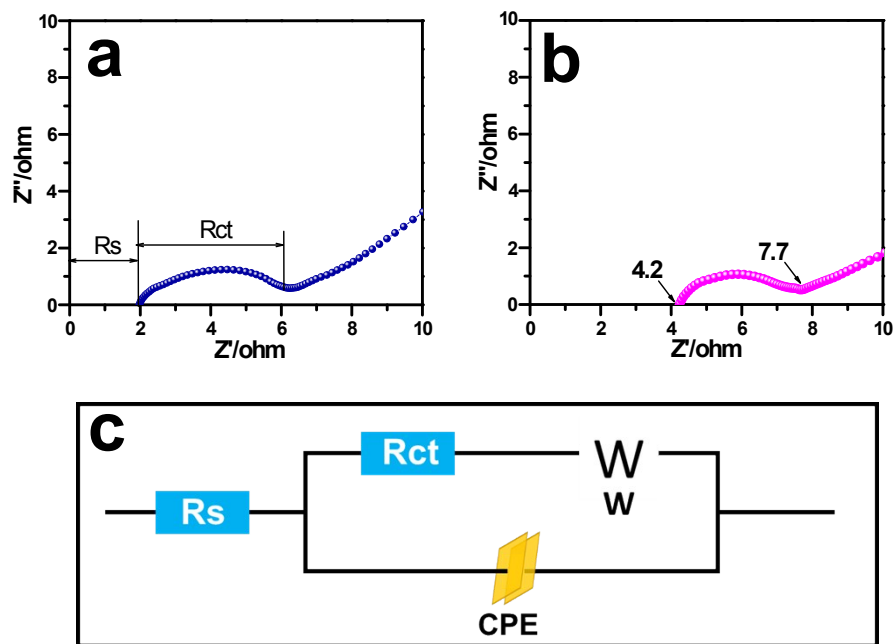

**Figure S12.** Electrochemical impedance spectra of AWC electrode; (a) in liquid electrolyte, (b) quasi-solid-state SSC, and (c) the equivalent circuit used to model the impedance data.

**Table S1.** Comparison of electrochemical performance of AWC thick electrode with some representative porous carbon-based electrodes recently reported for supercapacitors.

| Electrode material                              | Test system        | Cycles/<br>retention | Specific<br>capacitances                                            | Ref.                    |
|-------------------------------------------------|--------------------|----------------------|---------------------------------------------------------------------|-------------------------|
| Graphene-<br>PANI/Graphene                      | 3-electrode        | 5000/95%             | 190.6 mF/cm <sup>2</sup><br>0.5 mA/cm <sup>2</sup>                  | 1                       |
| CTAs@NCB-700 (T)                                | 3-electrode        | 10000/98%            | 366 mF/cm <sup>2</sup><br>1 mA/cm <sup>2</sup>                      | 2                       |
| CNT/PPy                                         | 3-electrode        | 10000/95%            | 280 mF/cm <sup>2</sup> ,<br>1.4 mA/cm <sup>2</sup>                  | 3                       |
| Graphene/PANI-paper                             | 3-electrode        | 10000/83%            | 335 mF/cm <sup>2</sup> ,<br>0.5 mA/cm <sup>2</sup>                  | 4                       |
| CNFs                                            | 2-electrode        | /                    | 144 F/g, 0.5 A/g                                                    | 5                       |
| Oxygen-deficient Fe <sub>2</sub> O <sub>3</sub> | 3-electrode        | 10000/95.2%          | 382.7 mF/cm <sup>2</sup> ,<br>0.5 mA/cm <sup>2</sup>                | 6                       |
| HPNC                                            | 3-electrode        | 5000/81%             | 172 F/g, 0.1 A/g                                                    | 7                       |
| MnO <sub>2</sub> /ZnO//RGO                      | 3-electrode        | /                    | 230 mF/cm <sup>2</sup> ,<br>10 mV/s                                 | 8                       |
| MVNN-CNT                                        | 3-electrode        | /                    | 178 mF/cm <sup>2</sup> ,<br>1.1 mA/cm <sup>2</sup>                  | 9                       |
| NCF                                             | 3-electrode        | 1000/95.8%           | 332 mF/cm <sup>2</sup><br>1 mA/cm <sup>2</sup>                      | 10                      |
| ACC                                             | 3-electrode        | 20000/97%            | 88 mF/cm <sup>2</sup><br>10 mV/s                                    | 11                      |
| LSG-EC                                          | 3-electrode        | 10000/96.5%          | 3.67 mF/cm <sup>2</sup><br>1 A/g                                    | 12                      |
| <b>AWC</b>                                      | <b>3-electrode</b> | <b>10000/96%</b>     | <b>235 F/g,<br/>6850 mF/cm<sup>2</sup>,<br/>1 mA/cm<sup>2</sup></b> | <b><i>This work</i></b> |

**Table S2:** Volumetric capacitance and energy density comparison of the AWC thick electrode and some representative carbon-/metal oxide-based electrodes at device level.

| Electrode material                                  | Volumetric capacitance                           | Volumetric Energy density (mW h cm <sup>-3</sup> )    | Cycles/retention | Specific capacitances                                          | Ref.             |
|-----------------------------------------------------|--------------------------------------------------|-------------------------------------------------------|------------------|----------------------------------------------------------------|------------------|
| Graphene/PANI-paper                                 | 3.55 F/cm <sup>3</sup> ,                         | 0.32 mW h/cm <sup>3</sup> ,                           | 10000/           | 77.8 mF/cm <sup>2</sup>                                        | 4                |
|                                                     | 4.57 mA/cm <sup>3</sup>                          | 540 mW/cm <sup>3</sup>                                | 83%              | 0.1 mA/cm <sup>2</sup>                                         |                  |
| Oxygen-deficient Fe <sub>2</sub> O <sub>3</sub>     | 1.21 F/cm <sup>3</sup> ,                         | 0.41 mW h/cm <sup>3</sup> ,                           | 6000/            | 382.7 mF/cm <sup>2</sup>                                       | 6                |
|                                                     | 0.5 mA/cm <sup>3</sup>                           | 100 mW/cm <sup>3</sup>                                | 81.6%            | 0.5 mA/cm <sup>2</sup>                                         |                  |
| MnO <sub>2</sub> /ZnO//RGO                          | 0.52 F/cm <sup>3</sup> ,                         | 0.234 mW h/cm <sup>3</sup> ,                          | 5000/            | 250 mF/cm <sup>2</sup> ,                                       | 8                |
|                                                     | 10 mV/s                                          | 133 mW/cm <sup>3</sup>                                | 98.4%            | 10 mV/s                                                        |                  |
| NCF                                                 | 0.132 F/cm <sup>3</sup> ,                        | 0.018 mW h/cm <sup>3</sup> ,                          | 4000/            | /                                                              | 10               |
|                                                     | 1 mA/cm <sup>2</sup>                             | 1 8mW/cm <sup>3</sup>                                 | 96%              |                                                                |                  |
| ACC                                                 | 0.067 F/cm <sup>3</sup> ,                        | 0.055 mW h/cm <sup>3</sup> ,                          | 20000/           | 31 mF/cm <sup>3</sup> ,                                        | 11               |
|                                                     | 10 mV/s                                          | 2 mW/cm <sup>3</sup>                                  | 95%              | 10 mV/s                                                        |                  |
| LSG                                                 | 0.003 F/cm <sup>3</sup> ,                        | 1.36 mW h/cm <sup>3</sup> ,                           | 10000/           | /                                                              | 12               |
|                                                     | 10 mA/cm <sup>3</sup>                            | 20 mW/cm <sup>3</sup>                                 | 97%              |                                                                |                  |
| MnO <sub>2</sub> /C                                 | 2.5 F/cm <sup>3</sup> ,                          | 0.12 mW h/cm <sup>3</sup>                             | 10000/           | /                                                              | 13               |
|                                                     | 20 V/s                                           | 400 mW/cm <sup>3</sup>                                | 84%              |                                                                |                  |
| BC                                                  | 2.1 F/cm <sup>3</sup> ,                          | 0.24 mW h/cm <sup>3</sup> ,                           | 10000/           | /                                                              | 14               |
|                                                     | 33 mA/cm <sup>3</sup>                            | 6100 mW/cm <sup>3</sup>                               | 96%              |                                                                |                  |
| CoP/MnO <sub>2</sub> /CC                            | 1.94 F/cm <sup>3</sup> ,                         | 0.69 mW h/cm <sup>3</sup> ,                           | 5000/            | 571.3 mF/cm <sup>2</sup> ,                                     | 15               |
|                                                     | 1 mA/cm <sup>3</sup>                             | 114.2 mW/cm <sup>3</sup>                              | 82%              | 1 mA/cm <sup>2</sup>                                           |                  |
| Fe <sub>2</sub> O <sub>3</sub> /MnO <sub>2</sub>    | 1.5 F/cm <sup>3</sup> ,                          | 0.55 mW h/cm <sup>3</sup> ,                           | 5000/            | 180.4 mF/cm <sup>2</sup> ,                                     | 16               |
|                                                     | 2 mA/cm <sup>3</sup>                             | 139.1 mW/cm <sup>3</sup>                              | 84%              | 1 mA/cm <sup>2</sup>                                           |                  |
| Ni(OH) <sub>2</sub> /Mn <sub>3</sub> O <sub>4</sub> | 2.07 F/cm <sup>3</sup> ,                         | 0.35 mW h/cm <sup>3</sup> ,                           | 12000/           | 372.5 mF/cm <sup>2</sup> ,                                     | 17               |
|                                                     | 1 mA/cm <sup>3</sup>                             | 32.5 mW/cm <sup>3</sup>                               | 83.3%            | 1 mA/cm <sup>2</sup>                                           |                  |
| AWC                                                 | 5.58 F/cm <sup>3</sup><br>3.3 mA/cm <sup>3</sup> | 0.77 mW h cm <sup>-3</sup><br>2500 mWcm <sup>-3</sup> | 10000/<br>86%    | 33.5 F/g,<br>1675 mF/cm <sup>2</sup> ,<br>1 mA/cm <sup>2</sup> | <i>This work</i> |

## References

1. Chi, K.; Zhang, Z.; Xi, J.; Huang, Y.; Xiao, F.; Wang, S.; Liu, Y., Freestanding graphene paper supported three-dimensional porous graphene-polyaniline nanocomposite synthesized by inkjet printing and in flexible all-solid-state supercapacitor. *ACS Appl. Mater. Interfaces* **2014**, *6* (18), 16312-9.
2. Tang, Z.; Zhang, G.; Zhang, H.; Wang, L.; Shi, H.; Wei, D.; Duan, H., MOF-derived N-doped carbon bubbles on carbon tube arrays for flexible high-rate supercapacitors. *Energy Storage Mater.* **2018**, *10*, 75-84.
3. Chen, Y.; Du, L.; Yang, P.; Sun, P.; Yu, X.; Mai, W., Significantly enhanced robustness and electrochemical performance of flexible carbon nanotube-based supercapacitors by electrodepositing polypyrrole. *J. Power Sources* **2015**, *287*, 68-74.
4. Yao, B.; Yuan, L.; Xiao, X.; Zhang, J.; Qi, Y.; Zhou, J.; Zhou, J.; Hu, B.; Chen, W., Paper-based solid-state supercapacitors with pencil-drawing graphite/polyaniline networks hybrid electrodes. *Nano Energy* **2013**, *2* (6), 1071-1078.
5. Li, S. C.; Hu, B. C.; Ding, Y. W.; Liang, H. W.; Li, C.; Yu, Z. Y.; Wu, Z. Y.; Chen, W. S.; Yu, S. H., Wood-Derived Ultrathin Carbon Nanofiber Aerogels. *Angew. Chem. Int. Ed. Engl.* **2018**, *57* (24), 7085-7090.
6. Lu, X.; Zeng, Y.; Yu, M.; Zhai, T.; Liang, C.; Xie, S.; Balogun, M. S.; Tong, Y., Oxygen-deficient hematite nanorods as high-performance and novel negative electrodes for flexible asymmetric supercapacitors. *Adv. Mater.* **2014**, *26* (19), 3148-55.
7. Wang, Y.; Liu, T.; Lin, X.; Chen, H.; Chen, S.; Jiang, Z.; Chen, Y.; Liu, J.; Huang, J.; Liu, M., Self-Templated Synthesis of Hierarchically Porous N-Doped Carbon Derived from Biomass for Supercapacitors. *ACS Sustainable Chem. Eng.* **2018**, *6* (11), 13932-13939.
8. Zilong, W.; Zhu, Z.; Qiu, J.; Yang, S., High performance flexible solid-state asymmetric supercapacitors from MnO<sub>2</sub>/ZnO core-shell nanorods//specially reduced graphene oxide. *J. Mater. Chem. C* **2014**, *2* (7), 1331-1336.
9. Xiao, X.; Peng, X.; Jin, H.; Li, T.; Zhang, C.; Gao, B.; Hu, B.; Huo, K.; Zhou, J., Freestanding mesoporous VN/CNT hybrid electrodes for flexible all-solid-state supercapacitors. *Adv. Mater.* **2013**, *25* (36), 5091-7.
10. Xiao, K.; Ding, L. X.; Liu, G.; Chen, H.; Wang, S.; Wang, H., Freestanding, Hydrophilic Nitrogen-Doped Carbon Foams for Highly Compressible All Solid-State Supercapacitors. *Adv. Mater.* **2016**, *28* (28), 5997-6002.
11. Wang, G.; Wang, H.; Lu, X.; Ling, Y.; Yu, M.; Zhai, T.; Tong, Y.; Li, Y., Solid-state supercapacitor based on activated carbon cloths exhibits excellent rate capability. *Adv. Mater.* **2014**, *26* (17), 2676-82, 2615.
12. El-Kady, M. F.; Strong, V.; Dubin, S.; Kaner, R. B., Laser Scribing of High-Performance and Flexible Graphene-Based Electrochemical Capacitors. *Science* **2012**, *335* (6074), 1326-1330.
13. Xiao, X.; Li, T. Q.; Yang, P. H.; Gao, Y.; Jin, H. Y.; Ni, W. J.; Zhan, W. H.; Zhang, X. H.; Cao, Y. Z.; Zhong, J. W.; Gong, L.; Yen, W. C.; Mai, W. J.; Chen, J.; Huo, K. F.; Chueh, Y. L.; Wang, Z. L.; Zhou, J., Fiber-Based All-Solid-State Flexible



- Supercapacitors for Self-Powered Systems. *Acs Nano* **2012**, *6* (10), 9200-9206.
14. Sun, Y.; Sills, R. B.; Hu, X.; Seh, Z. W.; Xiao, X.; Xu, H.; Luo, W.; Jin, H.; Xin, Y.; Li, T.; Zhang, Z.; Zhou, J.; Cai, W.; Huang, Y.; Cui, Y., A Bamboo-Inspired Nanostructure Design for Flexible, Foldable, and Twistable Energy Storage Devices. *Nano Lett.* **2015**, *15* (6), 3899-3906.
  15. Zheng, Z.; Retana, M.; Hu, X.; Luna, R.; Ikuhara, Y. H.; Zhou, W., Three-Dimensional Cobalt Phosphide Nanowire Arrays as Negative Electrode Material for Flexible Solid-State Asymmetric Supercapacitors. *ACS Appl. Mater. Interfaces* **2017**, *9* (20), 16986-16994.
  16. Yang, P.; Ding, Y.; Lin, Z.; Chen, Z.; Li, Y.; Qiang, P.; Ebrahimi, M.; Mai, W.; Wong, C. P.; Wang, Z. L., Low-cost high-performance solid-state asymmetric supercapacitors based on MnO<sub>2</sub> nanowires and Fe<sub>2</sub>O<sub>3</sub> nanotubes. *Nano Lett.* **2014**, *14* (2), 731-6.
  17. Feng, J. X.; Ye, S. H.; Lu, X. F.; Tong, Y. X.; Li, G. R., Asymmetric Paper Supercapacitor Based on Amorphous Porous Mn<sub>3</sub>O<sub>4</sub> Negative Electrode and Ni(OH)<sub>2</sub> Positive Electrode: A Novel and High-Performance Flexible Electrochemical Energy Storage Device. *ACS Appl Mater Interfaces* **2015**, *7* (21), 11444-51.
  18. E. Raymundo-Pinero, F. Leroux, F. Beguin, *Adv. Mater.*, 2006, **18**, 1877-1882.
  19. D. W. Wang, F. Li, M. Liu, G. Q. Lu, H. M. Cheng, *Angew. Chem. Int. Ed.*, 2008, **47**, 373-376.
  20. J. Zhang, J. Jiang, H. Li, X. Zhao, *Energy Environ. Sci.*, 2011, *4*, 4009-4015.
